# Supplementary material
Source: publisher site journal article supplement (https://www.dovepress.com/article/414077)
Supplement: Supplementary file 1 [file get_supplementary_file.php]

**Table S1 Gene list of the panel**

| *AKT1* | *ALK* | *APC* | *AR* | *ARAF* | *ATM* | *AXL* | *BCL2L11* |
| --- | --- | --- | --- | --- | --- | --- | --- |
| *BRAF* | *BRCA1* | *BRCA2* | *CCND1* | *CD74* | *CDK4* | *CDK6* | *CDKN2A* |
| *CTNNB1* | *CYP2D6* | *DDR2* | *DPYD* | *EGFR* | *ERBB2* | *ERBB3* | *ERBB4* |
| *ESR1* | *FGF19* | *FGF3* | *FGF4* | *FGFR1* | *FGFR2* | *FGFR3* | *FLT3* |
| *HRAS* | *IDH1* | *IDH2* | *IGF1R* | *JAK1* | *JAK2* | *KDR* | *KIT* |
| *KRAS* | *MAP2K1* | *MET* | *MTOR* | *MYC* | *NF1* | *NOTCH1* | *NRAS* |
| *NRG1* | *NTRK1* | *NTRK2* | *NTRK3* | *PDGFRA* | *PIK3CA* | *PTCH1* | *PTEN* |
| *RAF1* | *RB1* | *RET* | *ROS1* | *SMAD4* | *SMO* | *STK11* | *TOP2A* |
| *TP53* | *TSC1* | *TSC2* | *UGT1A1* |  |  |  |  |
